# Supplementary material for: Is the Spatial Distribution of Mankind's Most Basic Economic Traits Determined by Climate and Soil Alone?
Source: PLoS One. 2010 May 5;5(5):e10416. doi: 10.1371/journal.pone.0010416 (PMC2864741; doi:10.1371/journal.pone.0010416)
Supplement: Table S1 — Georeferenced presence records of four landuse types used for modelling. (0.06 MB XLS) [file pone.0010416.s001.xls]

## Sheet: General Info & Sources
Table S1
Georeferenced cases of each of four landuse types, with references and comments.
see following Tabs.
General Method:
We classified each ethnic group according to landuse and looked up one or few localities
(with geographic coordinates) where the group occurs and practises the respective landuse.
These sites are not necessarily typical for settlement area of the ethnic group, nor did
we investiage the precice ethnographic classifiactions used in our sources.
Localities are, foremost, used just as random samples of landuse types.
In unclear cases, e.g. mixed landuse types, we tried to make best decision of how
to classify a certain locality.
However, some uncertainty may persist in some cases.
We excluded a priori records of high-tech, modern agriculture that became possible only w
ithin the last 50-100 years (e.g., greenhouses, non-traditional irrigation systems)
and plantations for ‘non-food’ crops, including (in this context) palm oil, tea, coffee and cocoa.
Important sources (not exclusive) were the follwing books:
Burenhult, G. (2000). Naturvölker heute: Beständigkeit und Wandel in der modernen Welt. Augsburg, Weltbild Verlag GmbH.
Ferrera, M. (2003). Völker der Welt. Verlag Karl Müller GmbH
MacKenzie, J. M. (2005). Peoples, nations and cultures: An A-Z of the peoples of the world, past and present. UK, Weidenfeld & Nicolson.
National Geographic (2003). Atlas der Völker: Kulturen, Traditionen, Alltag (2. ed.).Hamburg, National Geographic Deutschland .
Neubauer, H. (2008). The Survivors: Vom Ureinwohner zum Weltbürger. Tandem Verlag GmbH.
Scholz, F. (1991). Nomaden: Mobile Tierhaltung. Zur gegenwärtigen Lage von Nomaden und zu den Problemen und Chancen mobiler Tierhaltung. Berlin, Das arabische Buch.
Schultz, J. (2008). Die Ökozonen der Erde. 4. Aufl., Stuttgart, Verlag Eugen Ulmer.
Internet sources included
http://www.everyculture.com/
http://www.lonelyplanet.com/
http://www.wikipedia.org/
https://www.cia.gov/library/publications/the-world-factbook/index.html

## Sheet: Agriculture
Ethnic Group - AGR	Latitude (metric)	Longitude (metric)
Abelam/Abulas /Ambelas/Ambulas, Subgroup Wosera	-3.63	142.1
Abelam/Abulas /Ambelas/Ambulas, Subgroup Wosera	-3.63	143.05
Aceh	3.98	97.32
Aceh	4.98	97.42
Achang	24.32	97.92
Adyghe	44.8	40.25
Agaw/Agau/Agew	11.6	38.08
Agni	6.75	-3.45
Agni	7.17	-3.32
Akha	18.83	98.7
Akha	20.07	99.47
Akhvakh	42.27	45.8
Akwamu	5.52	-0.75
Albanians	40.78	19.67
Alur	2.5	31.08
Amhara	12.73	37.53
Amungme	-4.75	137.83
Andi	42.1	46.35
Anyi	5.93	-4.33
Apatani	27.53	93.82
Apatani	27.6	93.82
Arapesh	-2.97	141.28
Ashanti/Twi	6.68	-1.62
Atoni	-9.97	124.02
Australian aborigine group	-33.95	115.23
Australian aborigine group	-33.93	116.48
Azande	4.32	28.7
Babungo	6.08	10.45
Badui	-6.62	106.27
Bai	27.22	105.22
Bairu	-1.27	29.87
Bairu	-0.52	30.58
Balanta	11.87	-15.15
Bali-Aga	-8.6	116.53
Bali-Aga	-8.37	116.53
Baltis	35.68	75.8
Bambara	14.92	-9.93
Bambara	13.37	-6.3
Bamileke	5.97	10.27
Bamoun/Bamum	5.7	10.83
Banda	5.97	21.1
Bandjoun	5.35	10.38
Banjar-Malay	-3.75	114.6
Baoule	7.28	-3.7
Bartang	37.77	68.75
Batak	2.5	98.77
Batak	2.6	98.85
Belorus	53.15	29.4
Bemba	-11.17	32.93
Beninese	9.9	3.1
Berber	32.15	-5.62
Berber	29.28	103.3
Beta israel/Falasta	12.08	37
Bilin/Bilen/Bogo	15.8	38.43
Binandere	-8.75	148.22
Boa	0.5	25.3
Bobo	11.08	-4.33
Bondo	18.33	81.97
Botlikh	42.67	46.2
Bozo	15.22	-3.98
Bozo	16.52	-3.12
Bulgarian	42.67	27.03
Burkinabe	11.17	-4.55
Burkinabe	13.7	-0.18
Burmese	17.47	95.75
Carthaginians	36.63	10.32
Catalan	41.62	0.67
Chewa/Cewa/Achewa	-12.27	33.3
Chinese (Han)	30.87	108.42
Chinese (Han)	34.22	108.77
Chinese (Han)	34.7	109.32
Chinese (Han)	38.32	114.52
Chinese (Han)	43.87	122.2
Dagomba/Dogamba	10.97	-2.57
Dagomba/Dogamba	-2.5	28
Dali	25.68	100.18
Damara	-20.83	14.12
Dani	-4.05	138.88
Dani	-2.58	140.77
Danes	56	8.53
Danes	56.17	8.97
Danes	56.33	9.12
Danes	55.1	10.17
Dao	14	109
Darginians	42.43	47.15
Daribi	-6.5	144.73
Dayak/Iban/Kenyah	2.5	111.92
Dayak/Iban/Kenyah	-0.07	116.82
Dogon	14.35	-3.62
Dogon	14.15	-3.55
Dong	27.88	107.6
Dongria Kondh	19.55	83.37
Duala/Douala	4.13	9.4
Dutch	52.23	4.52
Dutch	52.23	4.58
Dutch	51.97	4.93
Dutch	51.22	5.93
Edo/Bini	6.55	5.87
Embu	-0.53	37.42
English	54.72	-1.47
English	51.25	-0.97
English	51.92	-0.4
English	52.1	1.15
Erzya	54.13	43.53
Estonians	59.05	24.93
Ewe	6.87	0.35
Fang/Pangwe/Mpangwe/Pahouin	1.32	11.1
Fang/Pangwe/Mpangwe/Pahouin	1.63	11.62
Fins	60.52	24.82
French	49.23	4.13
French	43.73	4.78
French	43.92	5.18
French	44.13	5.47
French	43.97	5.8
Friesian	53.2	5.8
Gajo/Gayo	3.98	97.33
Gajo/Gayo	4.33	97.62
Gaugau	46.3	28.75
German	49.87	6.47
German	49.78	6.83
German	49.68	6.97
German	49.4	12.7
Gogodala	-8.03	142.85
Gogodala	-8.22	142.95
Gogona	27.42	89.98
Gond	23.03	78.73
Greek	37.9	21.4
Guro/Kweni	7.67	-6.45
Guro/Kweni	7.02	-5.73
Gurung	28.35	83.63
Hakka	23.03	113.48
Hakka	24.75	116.75
Hausa	12.8	6.73
Hausa	12.72	6.78
Hombori	15.27	-1.7
Huli	-5.85	142.95
Hungarians	46.98	20.28
Hungarians	46.4	20.48
Hunzukuts/Hunzakuts/Hunza	36.3	74.65
Hutu/Bahutu/Wahutu	-1.95	30.05
Hutu/Bahutu/Wahutu	-2.17	30.08
Ibo/Igbo	6.18	7.08
Ibo/Igbo	5.33	7.1
Ibo/Igbo	5.42	7.92
Italian	43.47	11.03
Italian	43.42	11.22
Italian	44	11.35
Italian	42.4	11.47
Italian	43.27	11.98
Japanese	33	131.32
Japanese	36.07	139.45
Japanese	37.62	139.93
Javanese	-7.03	109.8
Jemenit	14.6	43.23
Jemenit	13.97	44.07
Jumma (Chakma & Marma)	22.77	92.05
Jumma (Chakma & Marma)	22.73	92.12
Kabyl	42.55	1.58
Kabyles	36.63	4.28
Kabyles	36.73	4.3
Kalasha/Kasivo	35.68	71.63
Kaluli	-6.48	142.87
Kapauku	-3.75	136.83
Karen/Kariang/Yang	20.03	99.4
Karo	5.18	36.02
Karo	5.82	36.63
Khmu/Khammu/Khamu	19.8	102.23
Kikuyu	1	37.07
Kikuyu	0.08	37.38
Konso	5.33	37.4
Konso	5.72	37.45
Kubu/Koeboe/Orang Darat	-2.34	101.8
Kubu/Koeboe/Orang Darat	-1.95	103.5
Kurds	37.9	40.23
Kurds	38.3	43.68
Lawa/Lua (Mon-Khmer)	18.12	98.33
Lawa/Lua (Mon-Khmer)	18.02	98.37
Lhotsampas	27	90.18
Lisu	26.9	98.85
Lisu	27.25	98.89
Lunda/Balunda/Kalunda	-11.42	24.55
Macedonians	41.18	21.47
Madagassians	-19.82	46.82
Maharashtra	21.35	77.67
Maharashtra	21.43	77.7
Malinke/Mandinka/Maninka/Manding/	12.08	-15.15
Malinke/Mandinka/Maninka/Manding/Mandingo/Mandin/Mande	13.58	-15.28
Maori	-45.5	169.33
Marind-Anim/Kaja-kaja/Tugeri	-8.02	139.6
Maring	-5.25	144.48
Mejprat/Mejbrat	-1.3	132.22
Mekeo	-8.42	146.4
Mekeo	-8.47	146.67
Mende/Boumpe	8.55	-11.82
Mende/Boumpe	7.97	-11.3
Mentawai	-1.32	98.87
Miao/Hmong/Mong	18.78	98.65
Miao/Hmong/Mong	18.78	98.9
Miao/Hmong/Mong	19.98	101.93
Minahasa	1.35	124.75
Minahasa	1.32	124.82
Minangkabau	-0.37	100.38
Minangkabau	-0.15	100.65
Minh Tan	22.95	104.93
Mitsogo	-0.89	10.97
Mitsogo	-1.12	11.2
Mokolo	10.7	13.82
Mon/Talaing	17.17	97.12
Mosuo	26.87	100.22
Motu	-9.4	147.27
Mtwara	-10.3	40.17
Naga	26.23	93.55
Naxi	26.88	100.17
Ngalong	27.43	90.23
Ngarrindjeri	-36	146.32
Nishi	27.7	93.63
Nivkhi	53.57	142.65
Ogiek	-0.58	35.62
Ogiek	-0.6	35.88
Ovambo	-17.4	15.93
Ovimbundu	-12.47	15.43
Padaung	19.4	97.83
Padaung	19.23	97.93
Palong	19.72	98.7
Palong (Mon-Khmer)/Ta Ang	19.67	98.78
Palong (Mon-Khmer)/Ta Ang	20.07	99.08
Persian	35.95	47.45
Persian	30.27	53.23
Polish	51.22	17.32
Portugese	39.15	-8.73
Portugese	37.03	-7.93
Punan	1.78	114.89
Punan	1.63	116.93
Punan	2.07	117.28
Roumsiki	10.6	13.55
Russian	53.35	35.97
Santali/Adivasi/Santal	26.18	91.73
Scottish	57.22	-2.1
Senufo	9.45	-5.63
Shan/Sha/Tai Shan/Sam/Thai Yai	22.18	98.23
Shan/Sha/Tai Shan/Sam/Thai Yai	20.7	98.3
Sherpa	27.58	86.53
Sherpa	27.82	86.58
Sikasso/Yanfolila	11.2	-8.17
Sikkim	27.3	88.58
Sorbes	51.28	14.42
Sotho	-29.78	27.33
Spanish	37.2	-3.05
Swahili	-6.68	39.18
Swanetian	43.07	42.6
Swanetian	43.02	42.86
Swedes	63.47	13.22
Swedes	63.23	14.02
Swedes	61.38	16.82
Swedes	57.5	18.52
Swiss	46.48	6.7
Swiss	46.95	7.57
Tamil	7	80.83
Tanimbar	-7.55	131.62
Tasaday	6.17	124.6
Tasaday	6.23	124.68
Telefolmin/Mountain Ok/Min	-5.12	141.63
Tibetan	28.41	87.05
Tibetan	28.46	87.16
Tigray	14.12	38.7
Toala	-2.82	120.18
Toraja	-2.97	119.9
Tsum	28.58	85.1
Tswana	-22	27.27
Tujia	25.55	112.92
Turks	39.42	34.43
Una (Pygmy)	-4.48	140.07
Vedda/Wanniyala-Aetto/Wanniya-laeto	7.53	81.13
Wa/Awa	25.7	100.15
Wakhi	37	73.62
Walser	45.85	7.93
Waropen/Wonti/Worpen	-0.8	133.05
Wolof	15.15	-16.8
Wolof	14.02	-16.08
Xishuangbanna	21.98	100.35
Xishuangbanna	21.5	100.62
Yali	-3.3	139.45
Yali	-4.43	139.55
Yao	19.37	110.57
Yao/Mien	19.95	100.18
Yoruba	6.28	1.85
Yoruba	6.77	4.23
Zhuang	25.27	110.25
Zulu	-23.9	29.45
Zulu	-28.3	31.4

## Sheet: Sedentary Animal Husbandry
Ethnic Group - ANIM	Latitude (metric)	Longitude (metric)
Acholi	1.82	33.12
Aghul	41.42	47.78
Bahima	-1.12	30.28
Bedu	30.57	33.77
Bedu	30.6	34.88
Bhutanese	27.48	90.67
Bretons	48.27	-3.15
Bretons	48.32	-3.47
Burungi	-6.35	35.63
Catalan	42.65	0.97
Danes	56.5	8.13
Dutch	52.87	6.52
Estonians	58.67	24.77
Fur	13.43	22.45
Fur	13.55	23.45
Greek	37.17	21.92
Hazara	34.53	69.17
Herero	-21.98	16.92
Herero	-19.12	13.62
Himba	-18.05	13.83
Himba	-17.42	13.03
Hungarian	47.57	21.13
Icelander	63.88	-20.43
Icelander	65.47	-22.2
Irish	53.63	-8.13
Kyrgiz	40.32	73.63
Kiwi (white New Zealander)	-38.53	176.07
Lures	33.33	48.6
Maputo	-26.68	32.58
Ndebele/Amandebele/Ndzundza/Manala/Matabele	-25.55	28.65
Ndebele/Amandebele/Ndzundza/Manala/Matabele	-25.43	28.72
Nigerese	14.72	0.67
Nuba	11.3	30.33
Nuba	15.58	32.52
Palestinian	31.4	35.15
Palestinian	31.42	35.18
Portugese	39.07	8.73
Qashqai	30.37	53.4
Qashqai	30.98	52.48
Rumanian	47.53	25.93
Sicilians	37.6	14.23
Surma	4.78	35.98
Turkana	3.13	35.63
Tutsi/Watussi	-1.95	30.05
Welsh	52.45	-3.87
Xhosa	-32.95	27.77
Xhosa	-30.95	27.77

## Sheet: Nomadic Pastoralism
Ethnic Group - PAST	Latitude (metric)	Longitude (metric)
Afar/Adal/Danakil	11.82	41.4
Anuak	11.4	34.9
Bachtiars	32.1	50.1
Bachtiars	32.32	50.85
Baggara	13.68	28.42
Bayad	50	93.7
Beja/Bega	20.5	32.83
Beja/Bega	27.73	61.18
Berber	29.72	-8.97
Berber	31.8	-5.77
Bhotia	27.87	86.6
Bhotia	33.43	80.07
Bororo (Fulbe)/Wodaabe	12	15
Bororo (Fulbe)/Wodaabe	12.55	14.43
Buryats	53.45	109.53
Buryats	54.5	109.95
Chanti/Ostjaks	62.62	68
Daza	17.1	13.22
Dinka	6.2	31.33
Dolgan	72.03	102.17
Dolgan	72.33	95.02
Dolpo-Pa	28.85	83.33
Evenki	60.33	102.27
Evenki	61.67	96.35
Evenki	70.12	157.32
Evenki	70.9	146.8
Fulbe/Peul /Massina/Fulani/Fula/Fellata	13.87	-4.55
Fulbe/Peul /Massina/Fulani/Fula/Fellata	16.78	6.93
Hamar	4.95	36.48
Howeitat	29.57	35.42
Hungarians (Puszta)	46.8	20.02
Ikelan/Bella/Bellah	13.23	6.9
Kababish	15.07	29.98
Kazakhs	48.57	87.43
Kazakhs	49.27	86.02
Khampa	29.98	100.27
Khampa	33.5	112.15
Khant/Khanty/Ostyak	61.02	69.83
Komi	62.05	50.45
Korjaks	57.4	158.9
Korjaks	60.85	164.62
Korjaks	60.87	164.58
Kyrgiz	41.92	75.17
Ladakhi	34.17	77.57
Ladakhi	34.3	77.52
Laya/Layap	28.05	89.7
Mansen/Wogulen	63.67	63.27
Massai	-3.37	36.67
Massai	-3.2	35.47
Maures	20.48	-12.32
Mongolians	48.02	91.57
Mursi	5.89	35.73
Nenet/Nenz/Samoyeds	66.85	70.85
Nenet/Nenz/Samoyeds	67.6	53
Nganasan	74	97.98
Pashtun	37.02	68.4
Persian	37.02	54.72
Peul	15.1	-9.9
Rabari	26.97	70.77
Rabari	27.07	71.05
Rendille	1.87	37.77
Samburu/Lokop/Loikop	0.33	36.87
Samburu/Lokop/Loikop	0.8	36.28
Sami/Laps	66.5	25.72
Sami/Laps	68.89	27.02
Sardinian	40.28	9.32
Sardinian	40.3	9.58
Sherpa	27.95	86.68
Shimshal	36.43	75.35
Somali	9.38	48.08
Swiss	46.4	7.77
Swiss	46.65	9.08
Toubou/Tibbu	21.78	17.4
Tsaaten	51.33	99.47
Tuareg	18.7	12.92
Turkmen	36.55	63.5
Turkmen	39.08	58.93
Tuwa/Urjanchaj	51.48	95.08
Tuwa/Urjanchaj	51.68	94.38
Uigurs	43.75	87.33
Yakuts	67.53	133.37

## Sheet: Hunters-and-Gatherers
Ethnic Group - HG	Latitude (metric)	Longitude (metric)
!Kung	-19.22	22.65
Agta	16.22	121.43
Ainu	42.55	141.35
Ainu	43.23	143.32
Aka/Bayaka	3.62	18.58
Aka/Bayaka	3.63	18.63
Andaman	12.2	92.93
Aranda	-23.68	132.92
Arrente	-23.7	133.82
Asmat	-5.48	138.08
Baka	2.53	15.82
Baka	2.9	16.27
Bengali	21.93	88.83
Chambri/Tchambuli	-4.13	143.1
Chambri/Tchambuli	-4.11	143.17
Efik	5.72	6.68
Fayu/Sehudate	-3.04	137.3
Fayu/Sehudate	-2.97	138.12
Foi	-6.45	143.37
Gallong	28.72	94.72
Hadzabe/Tindiga/Hadza/Kangeju and others	-3.65	35.35
Iatmul	-4.18	143.2
Iatmul	-4.12	143.07
Jakun	2.58	103.2
Jarawa	12.1	92.67
Korowai/Kolufo	-5.68	140.25
Koryak	60.33	165.5
Koryak	60.42	166.03
Koryak	60.72	164.63
Mailu	-10.38	149.35
Mani /Goy/Kui/Koye/Kuay	7.6	99.62
Mansi/Vogul	60.98	68.98
Mansi/Vogul	62.12	65.33
Mardu/Mardudjara	-25.9	125.8
Mardu/Mardudjara	-25.37	130.88
Masuane	-3.08	129.32
Mbuti	1.85	29.97
Mbuti	3.78	25.08
Mlabri/Mrabi	18.33	100.33
Moken	12.18	98.42
Moken	12.43	98.58
Motu	-9.52	147.32
Onge	10.68	92.4
Penan	4.05	114.82
Pintubi	-23.22	131.85
Pygmy (various groups)	3.38	27.53
San/Bushmen/Zhun/Twasi	-25.78	20.37
San/Bushmen/Zhun/Twasi	-24.93	20.42
San/Bushmen/Zhun/Twasi	-24.65	25.88
Sentinelesians	11.55	92.25
Sharchops	27.2	91.65
Torres Islanders	-9.85	142.58
Walpiri	-22.22	131.78
Wancho	26.87	95.3
Wancho	26.92	95.52
Wik	-13	141.9
Yongul	-12.89	134.72
Yukaghir/Odul	70.02	135.67
Yukaghir/Odul	70.32	157.83
